# Supplementary material for: Beyond Stress: Predictors of Job Satisfaction and Emotional Distress in Professional Nursing Home Caregivers
Source: Research Square preprint supplement (doi:10.21203/rs.3.rs-7809831/v1), 2025-11-13

**Supplementary Material**

**Table S1**. Characteristics of the residences

| Variables | N | Percentage |
| --- | --- | --- |
| Number of users |  |  |
| <45 | 14 | 8.2 % |
| 46-80 | 50 | 29.2 % |
| >80 | 97 | 56.7 % |
| Not answered | 10 | 5.8 % |
| Residence type |  |  |
| Private | 119 | 69.6 % |
| Public (M) | 28 | 16.3 % |
| Not answered | 24 | 14.0 % |

**Figure S1.** Linearity and homoskedasticity of residuals. Residuals are randomly scattered around the red line, suggesting no concerning non-linearities. The spread of residuals appears relatively constant across fitted values, indicating no strong evidence of heteroskedasticity.


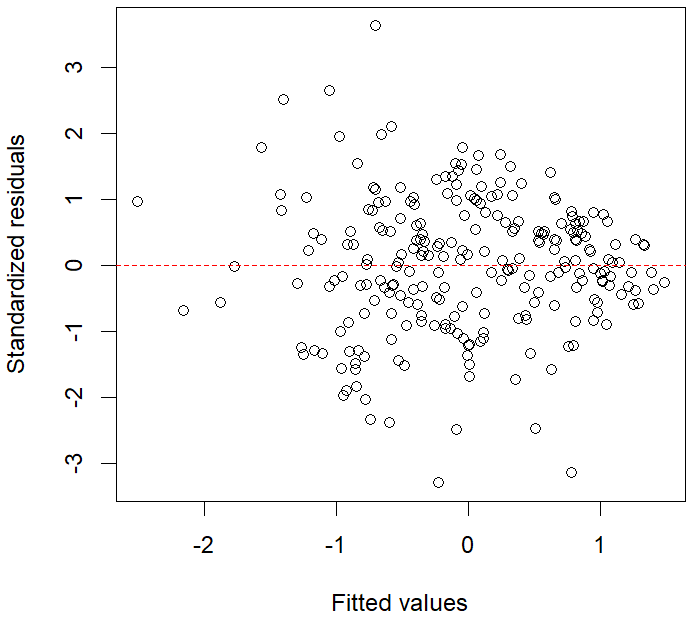

Supplement: Supplementary file 1 [file 0c90b0f958520d377b8a44cf.docx]
